# Supplementary material for: An ancient and conserved function for Armadillo‐related proteins in the control of spore and seed germination by abscisic acid
Source: PubMed Central journal article supplement (PMC4982054; doi:10.1111/nph.13938), 2016-04-04
Supplement: NPH-211-940-s001.pdf [file NPH-211-940-s001.pdf]

## **New Phytologist Supporting Information Figs S1–S4, Table S1 and Methods S1**

Article title: An ancient and conserved function for Armadillo-related proteins in the control of seed and spore germination by abscisic acid

Authors: Laura A. Moody, Younousse Saidi, Daniel J. Gibbs, Anushree Choudhary, Daniel Holloway, Eleanor F. Vesty, Kiran Kaur Bansal, Susan J. Bradshaw and Juliet C. Coates

Article acceptance date: 15 February 2016

The following Supporting Information is available for this article:

**Fig. S1** PHYSCODILLO-GFP fusions are turned over by the proteasome.

**Fig. S2** Generation of a *physcodillo1A/1B/2* triple mutant by targeted gene replacement.

**Fig. S3** Sequencing of the replaced *physcodillo1A/1B* locus in the *physcodillo2* mutant background, generating triple mutants number 8 and number 16.

**Fig. S4** *physcodillo* triple mutants show no obvious differences in rhizoid development or vegetative ABA responses.

**Table S1** Primers used to generate and characterize *PHYSCODILLO1A/1B* gene replacement and generate *arabidillo* mutant rescue lines

**Methods S1** Generation of PHYSCODILLO-GFP transgenic plants, construction of *arabidillo* mutant rescue lines, construction of *physcodillo1a/1b/2* triple deletion mutants and screening procedure.

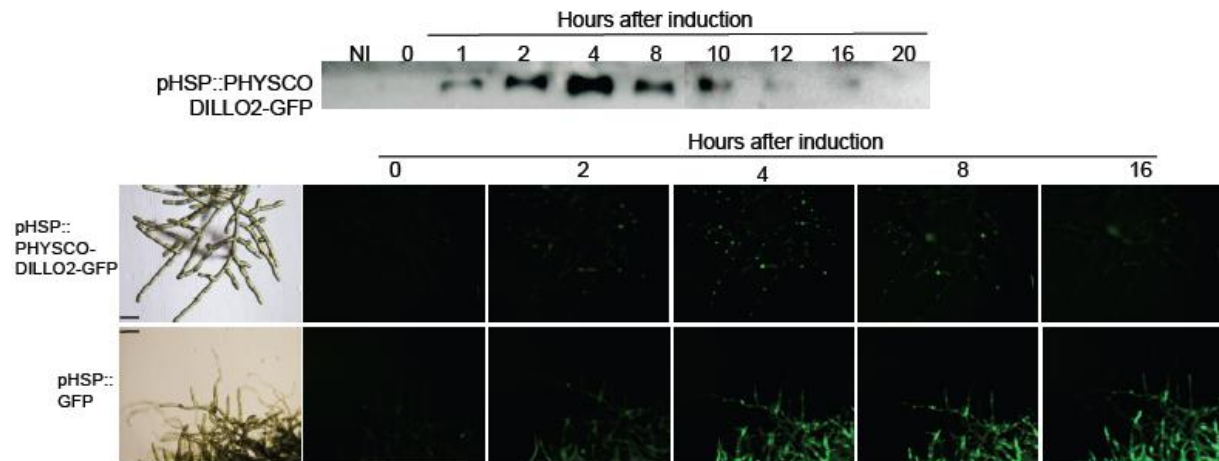

**Fig. S1** PHYSCODILLO-GFP fusions are turned over by the proteasome. Stability of *pHSP::PHYSCODILLO2-GFP* over a longer time period: upper panel, Western blot with anti-GFP; lower panel, fluorescence compared to a *pHSP::GFP* control.

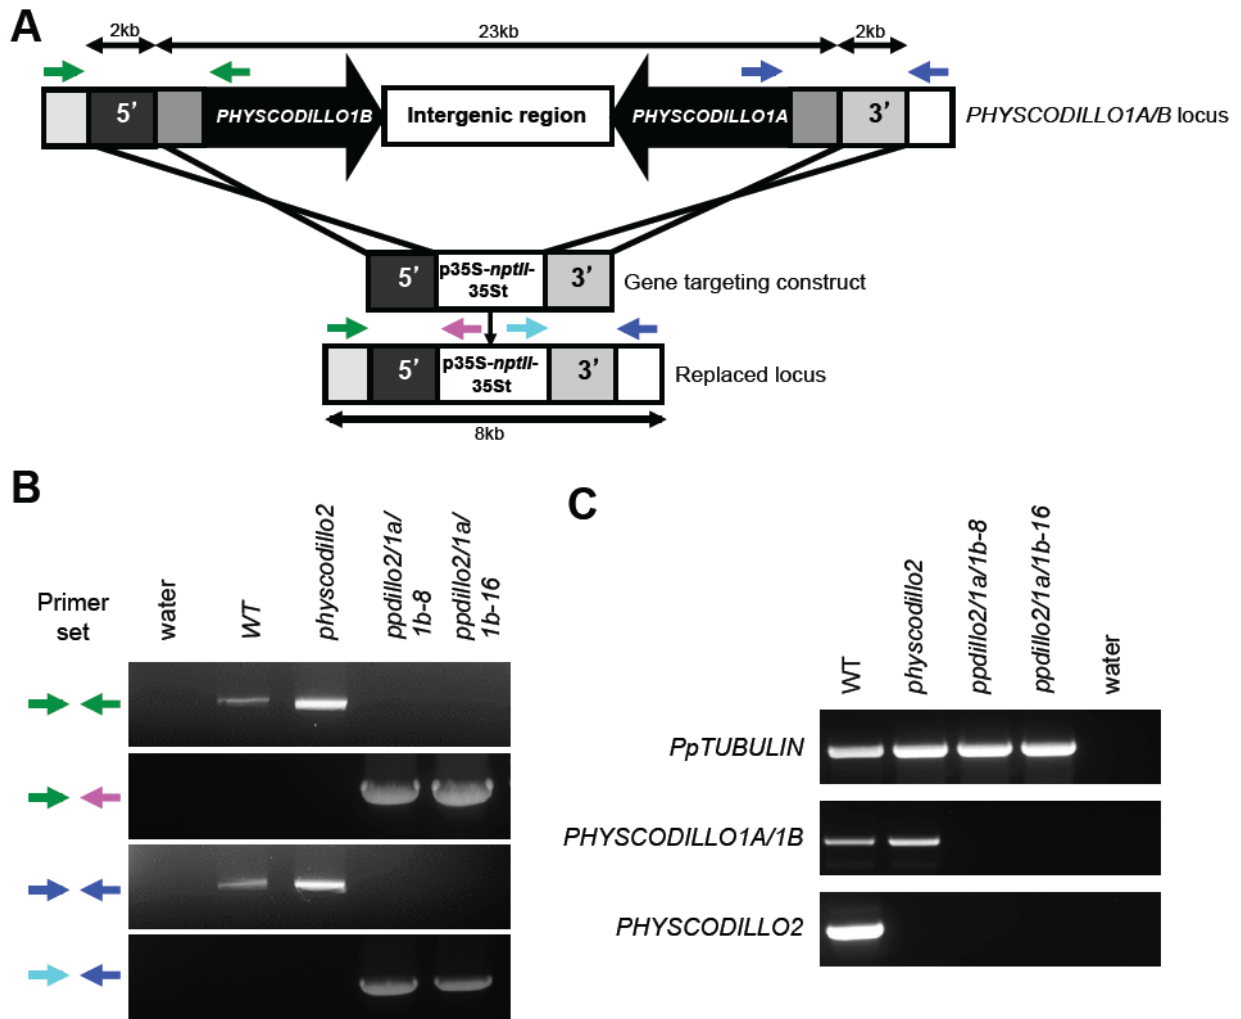

**Fig. S2** Generation of a *physcodillo1A/1B/2* triple mutant by targeted gene replacement. (A) Strategy for replacing the entire 23kb *PHYSCODILLO1A/1B* locus with the *nptII* resistance cassette in the *physcodillo2* mutant (25) background. The primers indicated in green, blue, magenta and cyan were used on wild type and mutant genomic DNA to obtain the PCR products shown in (B). (B) Characterisation of the *physcodillo1A/1B/2* triple mutant lines. Green and blue primer pairs demonstrate the presence of the *PHYSCODILLO1A/1B* locus in wild type and *PHYSCODILLO2* mutant plants, and its absence in triple mutant 8 and 16. Green–magenta and cyan–blue primer pairs demonstrate insertion of the gene replacement cassette in the *physcodillo1A/1B/2* triple mutants 8 and 16. PCR products generated using magenta and cyan pairs were sequenced; full sequences are given in Fig. S4. (C) RT-PCR demonstrates the presence of *PHYSCODILLO1* gene expression in the wild type and *physcodillo2* mutant, but not

in two independent triple mutant lines (line 16 and line 8). Furthermore, *PHYSCODILLO2* expression is absent from both the *physcodillo2* and *physcodillo1A/1B/2* mutants compared with the wild type control. *PpTUBULIN* was amplified as a positive control. Primer sequences are given in Table S1.

**Fig. S3** Sequencing of the replaced *physcodillo1A/1B* locus in the *physcodillo2* mutant background, generating triple mutants number 8 and number 16. PCR products were amplified as outlined in the Materials and Methods section, using the primers detailed in Table S1. Colour coding indicates the different regions of the replaced locus, and this is indicated in each sequence.

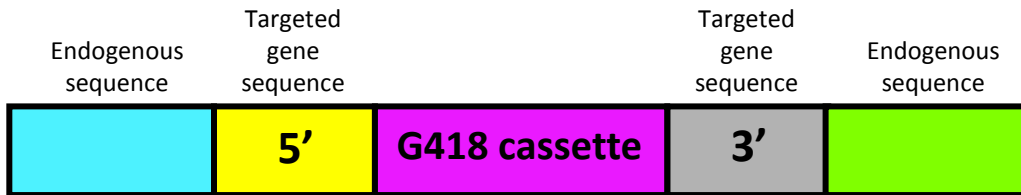

***physcodillo1A/1B/2*-line 8**  
**>5' insertion PCR product sequence**

```

GGAAANNNGCCCCNAAAATTGTTGAGCTTGAGAGCTGGTGTGATGTGTTCCGGGAGAGAGNAGAGACGAGAGTGTGAACGATCACGACGACTGGCTC
CGGTCCGGAACGAGTGTGACAGTGAAGGCTTGATCCAAATGTCTTGTGGCCTGAGTGATGTTTTTCGTGGTTGAGGGCTTTTCAACTCCGCAGAGA
CAGTTGGTGCTGAAAAGTCTGGGAAGCAAGTGGGTAGATTGCAATTTGTGCCGTTAGGTCTCCGTCGACACTGGAATTAGCGGTTACACGCCGAGT
GAACTTGTAGTGAGCATTCGGACAGACCATGCCCTAGCAATCTCGCTCGGTTAGGCTCGTCATTTGGAAACGCTGAATCCGTCGCCAAAGCTTTCT
CTCTTTCGCCACTACCCCTACTCGTAATCTCTCCCCACACACCTTCATTTGGGCAGTATGGATGCCAATTTCTTCCCGTTGACTACTTCAAAT
TCCGTACTCAAAGTGTCTCCTGACCTGTGACGCGTTGCCGAAGATATGCTGGCTGAATTCGGCCTCTCTGCAACGTAGGACAAATGCTTCAGA
GTGCCCGGTCAAAGTAATACGCAGATGGATATCCGTTTCTTCAACACGAAATTTCAAAGTCCACACGATAGTTCAAACGGAGAAGTGAGAGGA
GAAAACGACACCACAACGGCTCATCTCGAAGTTGCGAAGATCCGAAACAAAGAAAGTTGGGGCATAGATATGAGGGGGCGCAGGATAGTGATTCAA
AGTGATATCTGGATTGGAGCGATCAACTAGAGGCAACAGTCAGATTGATCATGGGACAAGAAACATGAGGTCATTATAAAACAGTACCCTGAAAA
ATATTCACAGATTTGCTTCTCAACTTCTGGAACAAGTTGGAAAGTACGTAGTATAATCAATTAATGGGAGGACACACATGAAAATATCCAACAA
GCGGGCGCGCAAGTCAATGTGGCGGTGGACGATCAGGAGCAGCAGCAGACTGTTGTCTATAAGAAAGCCAGGATAACATCGTCGCCGACGTCGGCT
TGTGGTGCATCGGCGGTGCCCTATAGAATCAGGTGTTAAAATTGGCGCGGTCGCGATGCCATTGGACAAGTCTGCCAGATGAAACCGTGCTTG
GGTGTGTTAATCTGCTGAACCACAGGGACATGGCGAGCCTTGGCTCGGTGTAAGGGATGGCAGGTGCTGGGGAGCTCGCAGTCCGCTGTGGAATTC
GTCGGATCTCGGNTGCACACTTGAATTCGGAGATGGTGTCTGCGCTGGCAGGACAATGCTCGAATTTGGAGGCGCTGAAGTTCCCGCAGAGGTGCC
TTTGCGAGCTCAATTTGGGGTTCAGGCGAAGGGGCTTAGGGAAATGAGCGGCGATTGCTGCAGCCAGCTGTCCGATGCAACCCCTGTCCATGGTGG
TCGCCCGCATGCGAACCTGGAGAGCAAGGCCCTTTGAACTACCGATCTCTCTCCCATCTCGATCTTCCCTCCCTCTCGCTTTCGTGATTGATGTT
AATCCCAGAGAATAAAGTCCACCTGACCCAATTTGTAAAACAAGTCTTGGAAAGTCCAGCATTTCTCACACAGAATGAAGCATTGTGCGTGCTC
GCGGTCCCAACAAGCACTGGCGAGTTTACGGCGAAAAAGTTCCCTGGCGCAGGTACAACGTGAAAAAGTAGGAGAGTGCAATTCACATACAGAGAATT
TCCGAGCGAAGTCCATCAAATTTGGGTTCTGGCAGTCCCTCATCGCGACGAACGACGGTCCAACATGGTCAACGAAACCGAGAGAACAACCTTCTT
GTTCTGTCATCAGAGCTTCATTTCCGTTCTTACCAGACGCCGTTCTAGGGCGAAGTCAACTCCAACAACAACAACAGCTTCCCTGAGATAAATGCCCTT
CTAAAAGAGAGTACTATTACCAGCTTGTGACAGCCGAGAACAATTAAGAATTATACTACTTTAATTTCTCGAATTTATCANAAATNAGTCCAACAACAT
ATGCATAAAAAATAAATAAATATATGATATGCATAAAAAATAAATCCGGATCCCCGGGCTGCAGGAATTCGATTCGAGGGGGGGCCCGGTACCCTT
ACTCCAAAAATGTCAAAGATACAGTCTCAGAAGACCAAAGGGCTATTGAGACTTTTCAACAAGGGTAATTTCCGGAAACCTCCTCGGATTCATTG
CCCAGCTATCTGTCACTTCATCGAAAGGACAGTAGAAAAGGAAGGTGGCTCCTACAAATGCCATCATTCGCATAAAGGAAAGGCTATCATTCAGAT
GCCTCTGCCGACAGTGGTCCCAAAGATGGACCCCAACCCAGGAGCATCGTGGAAAAAGAGACGTTCCAAACCAGCTCTCAAAGCAAGTGGATT
GATGTGACATCTCCACTGACGTAAGGGATGACGCACAATCCCCTATCCTTCGCAAGACCCTTCCCTATATAAGGAAGTTCATTTTCAATTTGGAGAG
GACAGCCCAAGCATGGAGAACCACCTGCAGGCATGATTGAACAAGATGGATTGCACGACAGTTCTCCGGCCGCTTGGGTGGAGAGGCTATTCGGCT
ATGACTGGGCACAACAGACAATCGGCTGCTCTGATGCCGCGGTGTTCCGGCTGTCAGCGCAGGGGCGCCCGGTTCTTTTGTCAAGACCGACCTGTC
CGGTGCCCTGAATGAACTCCAAGACGAGGCAGCGCGGTATCGTGGCTGGCCACGACGGGCTTCCCTGCGCAGCTGTNCTCTAAANGGNCACTGAA
CGGGAAGGACTGGCTCCTATTGGCCTTATTNAGGGGCGAGATCTCCTGTCATCTCACCTTGCTCCTGCCGAGAAAGTTTCT

```

Endogenous (genomic, non-targeted) sequence  
 5' flanking (targeting) sequence  
 G418 cassette sequence

***physcodillo1A/1B/2-line 8***  
**>3' insertion PCR product sequence**

```
CCTTCTTGACGAGTCTCTCTGAGCGGGACTCTGGGTTTCGGACGGTACGCTGAAATCACCAGTCTCTCTCTACNAATCTATCTCTCTATTTTCTC  
CATAAATAATGTGTGAGTAGTTTCCCGATAAGGGAAATTAGGGTCTTATAGGGTTTCGCTCATGTGTGAGCATATAAGAAACCCTTAGTATGTAT  
TTGTATTTGTAATAACTTCTATCAATAAAATTTCTAATTCCTAAAACCAAAATCCAGTACTAAAATCCAGATCTCCTAAAAGTCCCTATAGATCTTT  
GTCGTGAATATAAACACAGACAGAGACTAAACCTGGAGCCAGACGCCGTTTCAAGCTAGAAGTACCCGCTTAGGCAGGAGGCCGTTAGGGAAAA  
GATGCTAAGGCAGGGTTGGTTACGTTGACTCCCCCTAGGTTTGGTTTAAATATGATGAAGTGGACGGAAGGAAGGGAAGACAAGGAAGGATAAG  
GTTGCAGGCCCTGTGCAAGGTAAGAAGATGGAAATTTGATAGAGGTACGCTACTATACTTATACTATACTGCTAAGGGAATGCTGTGATTTATACCT  
ATACCCCTAATAACCCCTTATCAATTTAAGAAATAATCCGCATAAGCCCCGCTTAAAAATGGTATCAGAGCCATGAATAGGTCTATGACCAAAA  
CTCAAGAGGATAAAACCTCACAAAATACGAAAGAGTTCTTAACTCTAAAGATAAAAAGATCTTCAAGATCAAAACTAGTTCCTCACACCGGTGAC  
GGGATCGCATGC GACTCTTGTGTTTTCTGCATCTGTCCATGGTAAGTTAAATTTAGTTTTGTATCAAGTCTCTGATTTTATGAAAATGTGAT  
TCTATGGATTAAGTGCTATTTGTTCTGTAGTCAACTCTTTAGTTAATCCTGCATTACTTTTGTATTTAAAATTCACTGGATTGTTTCGAGATGGTTTC  
GGATTTTTCGAGCCAATTTGGAGTTACTGTTTTAATTTTTCTTTTACATCGTGTAGTGCCTTTTTTTCCTTTTTTTTTTATCTTTTTTTTTTTTT  
TTTTTTTTTTTTCTTTTGTCAAGGTGGAATAGGTATGGATTGGAAGTCGATAACGGATTGTGTGCAATTTGCGTGTGAATTTCCACCAACTTATCA  
AAGGACTTATGTTCTGAACGATTTCTGAAAATACTGGTACTCTGCTGGCGGCTTTTAAATGCATCTGCAACTGATCTTGACCACTCGACTTTT  
CCGTCCCTGGAATTCGGAGAAGCTGTGGGTTGAGTGGGGCTAGAATTGGGTCGGTGAGGAAGTGAAGAAGTTACTCCTTGACCATCGAAAGTGT  
TCGTCTCTTGTTCGTCCGGCACTTGTACCCGTCGTTCCGGCGACGAGGGAGTGCCAAAACCCAAATTCGAGGGACACCGGTTCGGCGCAGTTTT  
GCGGTGTGAATATTACACCCCTACTTGTGAAGTTGTACTCGCGTTTGAATTTGTTGTTACAATTTTGTGCAAGCTTGAAGAACCAGGAGCTCGT  
AACATGACATAAATTTGTGAGAGAATGCTGGGTTTGTATAGAAGTTGGTGGAAAAAGTTGATGTAGATGGTCTCCACCGTCTGGACCAACATTT  
ATTACGAAAGTGAGAGGGAGGAAGAGAGAGAGAGAGAGAGAGAGAGAGAGAGAGAGAGAGAGAGAGAGAGAGAGAGAGAGAGAGAGAGAGAGAG  
TCTGGAGCAATCAACAGAGAGAGCTCAAGGAGCGTGAGGAATGCGGGTTCGACCTGAAATAAGTTCGTTATTTTCGTTTAGGTCGGCTTAGCAGATG  
AAGTCCGCTGAATTGCTGCTTGGACTGTCAATTGGTTGCTCCAGAGGCTCGATGGGGAGGAAGGTGTTTGGATGCGAATGAAGTCGTGAAGGAGGT  
TGAACGACTTTTGTAGTGGCAAAATTCGGTCATATGCTGGCAAGGATGGCTGCTTGGAGGAGTTTGGTTCCAGTGTCTTGGAGATTGTTGTCAGGGAA  
GTCTCTTCGGTAAGCAAAATCATTAGTTTGTGGTTTGTATCCAAATCGGGCAACATGTTGCCCTATCAAACCTCGCTTGTCAAGGCACAGCGAAGATGTT  
TTTACTTTTTTGGGTACCATTCGTTGCTGGCTCATCACACACAATGCCAAGAGTTGTATTGTAATCGCGACTTAATCCATACAGCTCTGCAGAC  
ACAGAAAAATGGTCACGAAAAATGGCCAGTATTTGCTACCAGCGATGGTATTCCTCAACCATGGACGGCTCCCTACGATGCGGGGACGCCCTACGTCT  
GAATCGCACCCCTCAGGTATGCCTCTTTGCGTGGTCTGAATGATGGAAGCGGAGAATCTGTTCTGGCATTGGAAGTTTCAGGTAACGAATTTGTG  
CAATGCTGGAAAGTATGTTAATCTGCATAAAGGTGGCAGATGCTGTTCAGGGATGAGCTGTTTCCCGCATTAGTCTTCGAGATTTCAAGGAAAGA  
ANAACAGCACTTCGNCCNNT
```

G418 cassette sequence

3' flanking (targeting) sequence

Endogenous (genomic, non-targeted) sequence

***physcodillo1A/1B/2*-line 16****>5' insertion PCR product sequence**

```
CGNGTTTCGCAGATAGTTTCCAGGTTCCGGAGATTCCAATACGGGAAATTTgTcaccCTGATTCTTGAGCTTGAGAGCTGGTGTGATGTGTTcGGGA
GAGAGTAGAGACGAGAGTTTGAACGATCACGACGACTGGCTCCGGTCCGAACGAGTGTGACAGTGGAAAGGCTTGATCCAAATGTCTTGTGGCCTG
AGTGATGTTTTCGTGGTTGAGGGCTTTCAACTCCGCAGAGACAGTTGGTGTGAAAAGTCTGGGGAAGCAAGTGGGTAGATTGCAATTTGTGCCGT
TAGGTCTCCGTCGACACTGGAATTAGCGGTTACACGCCGAGTGAACCTTGTAGTGTGAGCATTCCGACAGACCATGCCCTAGCAATCTCGCTCGGTTAG
GCTCGTCAATTTGGAACGCTGAATCCGTCCGCAAAGCTTTTTCTCTTTCTCCCACTACCCCTACTCGTAATTTCTCTCCCCACACACCTTCATTGGG
CAGTATGGATGCCAATTTCTTCCCCTGACTACTTCAAATTTCCGTACTCAAAGTGTCTCTGACCTGTGACGCGTTGCCGAAGATATTGTGCG
TGAATTCGGGCTCTCTGCAACGTAGGACAAAATGCTTCAGAGTGCCGGTCAAAGTAATACGCAGATGGATACTCCGTTTCTTCAACACGAAATTT
CAAATAGCCACAGCATAGTTCAAACCGGAGAAGTGGAGGAGAAAACGACACCACAACGGCTCATCTCGAAGTTTGCAGAGATCCGAAACAAAGAA
GTTGGGGCATAGATATGAGGGGGCGCAGGATAGTGGATTCAAAGTGATATCTGGATTGGAGCGATCAACTAGAGGCAACAGTCAGATTGATCATGGG
ACAAGAAACATGAGGTCAATATAAAACAGTACCACCTGAAAAATATTCAACGATTTTGTCTTCAACTTCTGGAAACAAGTTTGAAAGTATGTAGTA
TAATCAATTAATGGGAGGGACAGCACATGAAATATCCAACAAGCGCGCGCGGAAGTCAATGTGGCGGTGGACGATCAGGAGCAGCAGCAGACTGTT
GTCTATAAAGAAAGCCAGATAAACATCGTCGCCGACGTCCGTTGTGGTGCATCGGCCGCTGCCCTATAGAATCAGGTGTTAAAAATTGGCGCGGGTC
GCGATGCCCATTTGGACAAGTCTGCCAGATGAAACCGTCTGGGTTGTTAATCTGTGTAACCACAGGGACATGGCGAGCCTTGCCTCCGTGTGAAA
GGGATGGCAGGTCTGGGAGCTCGCAGTCCGTGTGGAATTCGTCGGATCTTCCGTTGCACACGTTGAATTCGGAGATGGTGTCTGCCCTGGCAGGA
CGATGCTCGAATTTGGAGGCGCTGAAGTTCGCGAGAGTGCCTTTCGAGCTCAATTTGGGGTTCAGGGCGAAGGGGCTTAGGAAAATGAGCGCGG
ATTGCTGCAGCCAGCTGTCGGATGCAACCCTGTCCATGGTGGTCCGCCGCGCATGCACCTGGAGAGCAAAGGCTTTTGAATACCGATCTCTCTC
CCCATCTCGATCTTCTCCCTCTCGCTTTCGTGATTGATGTTAATCCCAGAGAATAAAGTCCACCTGACCCAATTTTGTAAAAACAACCTGCTTTGAAA
AGCTCCAGCATTCTCACACAGAATGAAGCATTGTGCGTCTCGCGGTCCCAACAAGCACTGGCGAGTTTACGGCGAAAAAGTTCCTGGCGCAGGTAC
AACGTGAAAAAGTAGGAGAGTGAATTCACCTACAGAGAACCTTCCGAGCGAAGTCCATCAAATTTTGGGTTCTGGCACTGCCTCATCGCGCAGAACG
ACGGTCCAACATGGTCAACGAAACCGAGAGAACAACCTTCTTGTTCGTATCAGAGCTTCATTTCCGTTCTTACCAGACGCGCTTCTAGGGCGAAGT
CAACTCCAACAACAACAACAGCTTCCCTGAGATAAATGCCTTCTAAAAGAGAGTACTATTACCAGCTTGTGACAGCCGAGAACATTAAGAATTATAC
TACTTTAATTTCTCGAATTTATCAAAAATAAGTCCAACAACATATGCATAAAAAATAAATAAATCATGCATATGCATAAAAAATAAATCCGGATCCCC
CGGGCTGCAGGAATTCGATTCGAGGGGGGGCCCGGTACCCCTACTCCAAAAATGTCAAAGATACAGTCTCAGAAGACCAAAGGGCTATTGAGACTTT
TCAACAAAGGGTAATTTCCGGAAACCTCCTCGGATTCATTTGCCAGTATCTGTCACTTCATCGAAAGGACAGTAGAAAAGGAAGGTGGCTCCTAC
AAATGCCATCATTGCGATAAAGGAAAGGCTATCATTCAAGATGCCTCTGCCGACAGTGGTCCCAAAGATGGACCCCCACCCACGAGGAGCATCGTGG
AAAAAGAGACGTTCCAACCACGCTTCAAAGCAAGTGGATTGATGTGACATCTCCACTGACGTAAGGGATGACGCACAATCCCACTATCCTTCGCA
AGACCCTTCTCTATATAAGGAAGTTCAATTTCAATTTGGAGAGGACAGCCCAAGCATGGAGAACCAGCTGCAGGCATGATTGAACAAGATGGATTGC
ACGCAGTTCTCCGGCCGCTTGGGTGGAGAGGCTATTCCGCTATGACTGGGCACAACAGACAATCGGCTGCTCTGATGCCGCCGTGTCCGGCTGTC
AGCGCAGGGGGCGCCGGTCTTTTGTCAAGACCGACCTGTCCGGTGCCTGAATGAACTCCAAGACGAGGCAGCGCGGCTATCGTGGCTGGCCAG
ACGGGCGTTCTTGCAGCAGCTGTGCTCGACGTTGTCTCACTGAAGCGGGAAGGACTGGCTGCTATTGGGCGAAGTgcccGGGCGAGGATCTCCTGTCAT
CTCACCTTGCTCTGCCGAGAAAGtaCTNNNAANTTTCT
```

Endogenous (genomic, non-targeted) sequence

5' flanking (targeting) sequence

G418 cassette sequence

***phycodillo1A/1B/2*-line 16****>3' insertion PCR product sequence**

```
TCTACAAATCTATCTCTCTCTATTTTTCTCCNNTTTAANGNGTGAGTAGTTTTCCCGATAAGGGAAATTAGGGTTCTTATAGGGTTTCGCTCATGTGT
TGAGCATATAAGAAACCCTTAGTATGTATTTGTATTTGTAAAATACTTCTATCAATAAAATTTCTAATTCCTAAAACCAAAATCCAGTACTAAAATC
CAGATCTCCTAAAGTCCCTATAGATCTTTGTCTGTAATATAAAACCAGACACGAGACGACTAAACCTGGAGCCCAGACGCCGTTCTGAAGCTAGAAGTA
CCGCTTAGGCAGGAGGCCGTTAGGGAAAAGATGCTAAGGCAGGGTTGGTTACGTTGACTCCCCGTTAGGTTTAAATATGATGAAGTGGACGG
AAGGAAGGAGGAAAGACAAGGAAGGATAAGGTTGCAGGCCCTGTGCAAGGTAAGAAATGGAATTTGATAGAGGTACGCTACTATACTTATACTATA
CGTAAGGGAATGCTTGTATTTATACCTATAACCCCTAATAACCCCTTATCAATTTAAGAAATAATCCGCATAAGCCCCGCTTAAAAATGGTAT
CAGAGCCATGAATAGGCTATGACCAAACTCAAGAGGATAAAACCTCACCAAAATACGAAAGAGTTCTTAACCTCTAAAGATAAAAGATCTTTCAAG
ATCAAAGTACTCCCTCACACCGGTGACGGGGATCGCATGC GACTCTGTCTGTTTTTCTGTCATCTGCCATGGTAAGTTAAATGTAGTTTTGTAT
CAAGTTCTGTATTTTATGAAAATGTGATTCTATGGATTAAGTGCTATTTGTCTGTAGTCAACTCTTAGTTAATCCTGCATTACTTTTGATTTAA
AATCACTGGATTGTTTTCGAGATGGTTTTCGGATTTTTCGAGCCAATTTGGAGTACTGTTTTATTTAATTTTTCTTTTACATCGTGTAGTGCTTTTT
TTCTTTTTTTTTTATCTTTTTTTTTTTTTTTTTTTTTTTTTTTTTTTTGTCAAGGTGGAATAGGTATGGATTGGAAGTCGATAACGGATTGTTGTGCAT
TTCCGTGATGAATTTCCACCACTTATCAAAGACTTATGTCTTGAACGTATTTCTGAAAATACTGGTACTCTGCTTGGCGCGCTTTTAAATGCAT
CTGCAACTGATCTTGACCACTCGACTTTTCCGTCCCTGGAATTTCCGGAGAAGCTGTGGGGTTGAGTGGGGGCTAGAATGGGTGGTGGTGAAGAACTGA
GAAGTTTACTCCTTGACCATCGAAAGTGTTCGTCTCTGTTTTCGTCCGCACCTGTGCACCGTCGTTCCGGCGACGAGGGAGTGCCAAAACCCAAA
TTCCGAGGGACACCGGTGCGCGCAGTTTTGCGGTGTGAATATTACACCCTACTTGTGAAAGTTGACTCGCGTTTTGAAATTTGTTGTTACAATTTT
GTCGAAGCTTGTAAGAACCGGAGCTCGTAACATGACATAATTTGTGAGAGAATGCTGGTTTTGTATAGAAGTTGGTGGAAAAGTTGATTGTAG
ATGGTCTCCACCGTCTTGACCAACATTTATTACGAAAGTGAGAGGGAGGAAGAGAGAGAGAGAGAGCGAGAGAGAGAGCGGGAGAGAGAGATCGGC
TTCTTAAACCTTTTTCCGATCATTCGTTGTCTGGAGCAATCAACAGAGAGAGCTCAAGGAGCGTGAGGAATGCGGGTTCGACCTGAAATAAGTTCGT
TATTTTCGTTTTAGGTCGGCTTAGCAGATGAAGTCCGCTGAATGTCTGCTTGGACTGTCAATGGTTGCTCCAGAGGCTCGATGGGGAGGAAGGTGTT
TGGATGCGANTGANGTCGTGTAAGGAGGTTGAACGACTTTTGAGTGGCAAATTCGGTCATATGCTGGCAAGGATGGCTGCTTGGAGGAGTTTGGTTC
CAGTGTCTGGAGATTGTTGTCAGGGAAGTCTTTCGGTAAGCAAATCATTAGTTTTGGTTTATCCAAATCGGGCAACATGTTGCCCTATCAAA
CTCGCTTGTCAAGGCACAGCGAAGATGTTTTACTCTTTTTAGGGTACCATTGCTTGGCTCATCACACAAATGCCAAGAGTTGATTTGTAAT
CGCGACTTAATCCATACAGTCTGCAGACACAGAAAATGGTACGAAAATGGCCAGTATTTGCTACCANGCGATGGTATTCTCAACCATGGACGG
CTCCCTACGATGCGGGGCAGCCTACGCTGAAATCGCACCCCTCAgGTATGCCTCTTTGCgTGggTCTGAATGATGGAAGCggAcAATCTGcTCTGGCA
TTTtGgANGTCCANG TAACNAATTTGNNCANTGCTGAG
```

**G418 cassette sequence****3' flanking sequence****Endogenous sequence**



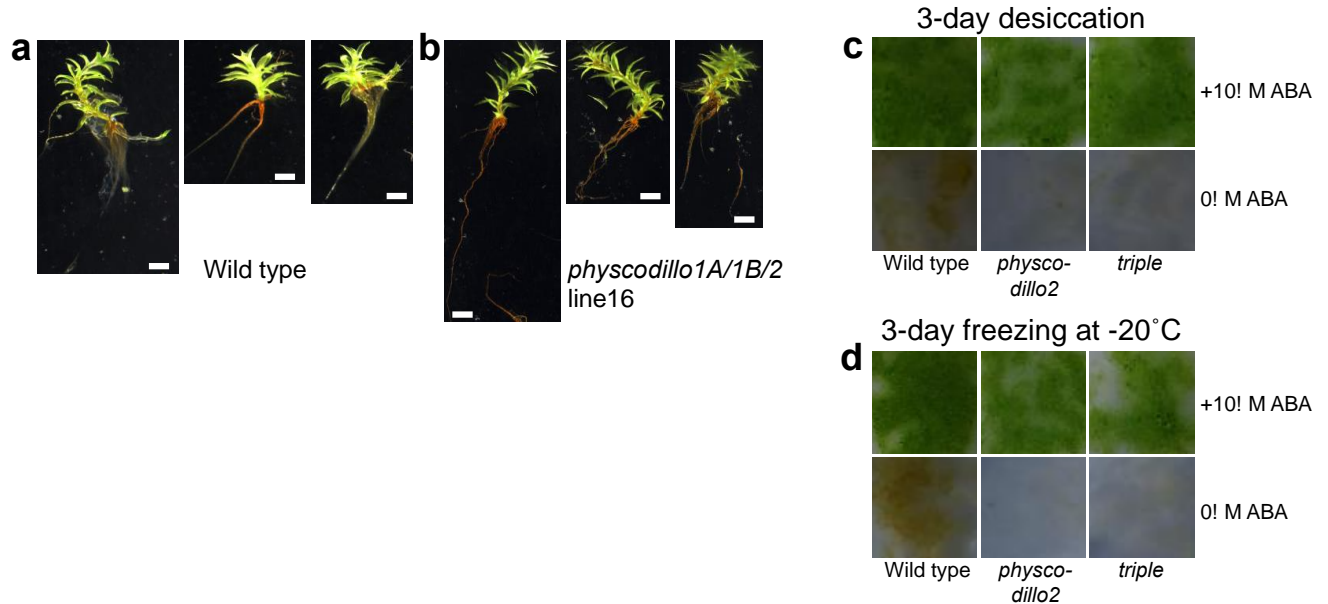

**Fig. S4** *physcodillo* triple mutants show no obvious differences in rhizoid development or vegetative ABA responses. (a) Wild type plants. Bars, 5 mm. (b) *physcodillo* triple mutant line 16 plants. Bars, 5 mm. (c) Seven-day-old protonemal tissue was pretreated  $\pm 10 \mu\text{M}$  ABA for 24 h, desiccated in a flow hood for 3 days, and then rehydrated for 3 days before assessing growth. No differences are seen between wild type, *physcodillo2* or *physcodillo* triple mutants in the presence or absence of ABA. (d) Seven-day-old protonemal tissue was pretreated  $\pm 10 \mu\text{M}$  ABA for 24 h, frozen at  $-20^\circ\text{C}$  for 3 days, and then placed at room temperature for 3 days before assessing growth. No differences are seen between wild type, *physcodillo2* or *physcodillo* triple mutants in the presence or absence of ABA. Experiments (c) and (d) were performed in triplicate: three biological repeats of each. Similar results were seen with  $100 \mu\text{M}$  ABA.

**Table S1** Primers used to generate and characterize *PHYSCODILLO1A/1B* gene replacement and generate *arabidillo* mutant rescue lines

|                                                                            |                                      |
|----------------------------------------------------------------------------|--------------------------------------|
| <b>Amplification of 5' flanking sequence for gene replacement cassette</b> |                                      |
| P1+3KO_5'F-2.XbaI                                                          | AAATCTAGAAGCTGGCTCCGGTCGGAACGAG      |
| P1+3KO_3'R-2.BamHI                                                         | AAAGGATCCGTTCTCGGCTGTCACAAGCTGG      |
| <b>Amplification of 3' flanking sequence for gene replacement cassette</b> |                                      |
| P1+3KO_3'F.SphI                                                            | AAAGCATGCGACTCTTGTCTGTTTTTCTGCATC    |
| P1+3KO_3'R.EcoRV                                                           | AAAGATATCCCTGAAACTTCCAAAATGCCAG      |
| <b>Primers to confirm 5' integration</b>                                   |                                      |
| P1+3KO5'F                                                                  | AGTTTCCAGGTTCCGGAGAT                 |
| G418.R.319                                                                 | TACTTTCTCGGCAGGAGCAAG                |
| <b>Primers to confirm 3' integration</b>                                   |                                      |
| P1+3KO3'R                                                                  | GGTAAACGAGACCGAAGTG                  |
| G418.F.341                                                                 | CCATCATGGCTGATGCAATGC                |
| <b>5' integration PCR product sequencing primers</b>                       |                                      |
| 35S_Reverse                                                                | TGATGGCATTGTAGGAGCC                  |
| 5'flank_seqF2                                                              | TTGCCGAAGATATTGCTGGC                 |
| 5'flank_seqF3                                                              | AAATATCCAACAAGCGGCGG                 |
| 5'flank_seqF4                                                              | CCCATCTCGATCTTCTCC                   |
| <b>3' integration PCR product sequencing primers</b>                       |                                      |
| G418_F                                                                     | TCGCCTTCTTGACGAGTTCT                 |
| pMBL10.vectorF                                                             | AAGTGGACGGAAGGAAGGAG                 |
| 3'flank_seqF2                                                              | TGGGCGGCTTTTAAATGCAT                 |
| 3'flank_seqF3                                                              | TCGTTTAGGTTCGGCTTAGCA                |
| <b>RT-PCR primers</b>                                                      |                                      |
| P1-RT.GSP.F                                                                | GCGCAATCGAAGCACTGGTGG                |
| P1-RT.GSP.R                                                                | TGTACGTCCTCAAATCAGAGTGC              |
| P2-RT.GSP.F                                                                | CGCAATTGAAGCACTGGTGGATCT             |
| P2-RT.GSP.R                                                                | ACGTCCTCAGAGTTCGAGTGTGC              |
| PptubF                                                                     | TGTGCTGTTGGACAATGAG                  |
| PptubR                                                                     | ACATCAGATCGAACTTGTG                  |
| <b>Rescue line primers</b>                                                 |                                      |
| P1/2-5'Start_BamHI                                                         | AAAGGATCCATGTCCAACAAGCGGCGGCG        |
| P1_3'end_no_STOP_NotI                                                      | AAAGCGGCCCGCCGACAGTGCCACCACCGTGTGTC  |
| Sel.5'St.XbaI                                                              | AAATCTAGAATGCGTCGCTTCGCCGAAATGCG     |
| Sel-St.NotI                                                                | AAGCGGCCGCGCTTTTCTCGCTCTGGCACAGCTCCA |

**Methods S1** Generation of PHYSCODILLO-GFP transgenic plants, construction of *arabidillo* mutant rescue lines, construction of *physcodillo1a/1b/2* triple deletion mutants and screening procedure.

#### Generation of PHYSCODILLO-GFP transgenic plants

The *PHYSCODILLO1* CDS was inserted in-frame with a GFP reporter gene in BamHI/HindIII cut *pHSP::MCS-GFP* (GenBank accession KP893621) to create *pHSP::PHYSCODILLO1-GFP*. The *pHSP::PHYSCODILLO1-GFP* cassette was then subcloned into pBS108CH-35SNPTb (GenBank accession GQ463722; Saidi *et al.*, 2009) using a half blunt strategy using the NotI and Asp718/SmaI sites. The *PHYSCODILLO2* CDS was inserted in-frame with a GFP reporter gene in XmaI/HindIII cut *pHSP::MCS-GFP* to create *pHSP::PHYSCODILLO2-GFP*. The *pHSP::PHYSCODILLO2-GFP* cassette was subcloned into pBS108CH-35SNPTb using a half blunt strategy using the NotI and Asp718/SmaI sites. As a control, the *pHSP::MCS-GFP* was similarly subcloned into pBS108CH-35SNPTb to create *pHSP::MCS-GFP-10835SNPTb*.

For stable expression, *pHSP::MCS-GFP-10835SNPTb*, *pHSP::PHYSCODILLO1-GFP* and *pHSP::PHYSCODILLO2-GFP* were transformed into wild type protoplasts and successful integration confirmed following two rounds of G418 selection.

#### Construction of *arabidillo* mutant rescue lines

35S::*PHYSCODILLO1-GFP* and 35S::*SELAGIDILLO-GFP* fusions were made in pGreen0029 by replacing *ARABIDILLO1* in the 35S::*ARABIDILLO1-GFP* construct (Coates *et al.*, 2006).

*PHYSCODILLO1* and *SELAGIDILLO* cDNA sequences were amplified using Long PCR enzyme mix (Thermo Scientific; Waltham, MA, USA). The *PHYSCODILLO1* CDS was amplified using P1/2-5'Start\_BamHI and P1\_3'end\_no\_STOP\_NotI and ligated into BamHI/NotI cut pGreen (containing 35S-GFP-ter; Coates *et al.*, 2006) to create 35S-*PHYSCODILLO1-GFP-ter*. The *SELAGIDILLO* CDS was amplified using Sel.5'St.XbaI and Sel-St.NotI and ligated into XbaI/NotI cut pGreen (containing 35S-GFP-ter) to create 35S-*SELAGIDILLO-GFP-ter*. Primer sequences are outlined in Table S1.

### Construction of *physcodillo1a/1b/2* triple deletion mutants and screening procedure

The *PHYSCODILLO1A/1B* double deletion construct was generated by cloning 5' and 3' homologous flanking sequences from *Physcomitrella* genomic DNA and inserting them into the pMBL10a vector either side of a G418 resistance cassette. The 5' flanking sequence was amplified using P1+3KO\_5'F-2.XbaI and P1+3KO\_3'R-2.BamHI and ligated into XbaI/BamHI cut pMBL10a to create pP1A+1BdbIKO-5'. The 3' flanking sequence was amplified using P1+3KO\_3'F.SphI and P1+3KO\_3'R.EcoRV and ligated into SphI/EcoRV cut pP1A+1BdbIKO-5'. The resulting construct was transformed into protoplasts isolated from the *physcodillo2* deletion mutant (Moody *et al.*, 2012). Two rounds of G418 selection were carried out to identify putative transformants. To verify the presence of a G418 resistance cassette within the *PHYSCODILLO1A/1B* locus and confirm the generation of *physcodillo1a/1b/2* triple deletion mutants, PCR was carried out using GoTaq DNA Polymerase (Promega; Madison, WI, USA). 5' integration was confirmed using the primers P1+3KO5'F and G418.R.319 and 3' integration was confirmed using the primers P1+3KO3'R and G418.F.341. The PCR reactions were repeated 3 times and on one occasion the PCR products were sequenced (Fig. S3). RT-PCR was carried out twice to confirm loss of *PHYSCODILLO1* mRNA expression. Primer sequences are outlined in Table S1.

### References

- Coates JC, Laplaze L, Haseloff J. 2006.** Armadillo-related proteins promote lateral root development in Arabidopsis. *Proc Natl Acad Sci, USA* **103**: 1621–1626.
- Moody LA, Saidi Y, Smiles EJ, Bradshaw SJ, Meddings M, Winn PJ, Coates JC. 2012.** *ARABIDILLO* gene homologues in basal land plants: species-specific gene duplication and likely functional redundancy. *Planta* **236**: 1927–1941.
- Saidi Y, Finka A, Muriset M, Bromberg Z, Weiss YG, Maathuis FJM, Goloubinoff P. 2009.** The heat shock response in moss plants is regulated by specific calcium-permeable channels in the plasma membrane. *Plant Cell* **21**: 2829–2843.
